# Supplementary material for: Co-design of mHealth Delivered Interventions: A Systematic Review to Assess Key Methods and Processes
Source: Springer Nature journal article supplement (doi:10.1007/s13668-016-0165-7), 2016-07-03
Supplement: MOESM1 [file 10333056]

**Supplementary material**

**1. Review search strategy for MEDLINE database**

1. co-design$.mp.

2. codesign$.mp.

3. Community-Based Participatory Research/

4. Consumer Participation/

5. action research.mp.

6. participatory design.mp.

7. co-production.mp.

8. experience based design.mp.

9. 1 or 2 or 3 or 4 or 5 or 6 or 7 or 8

10. Telemedicine/

11. mhealth.mp.

12. m-health.mp.

13. mobile health.mp.

14. Cell Phones/

15. mobile phone$.mp.

16. mobile device$.mp.

17. telehealth.mp.

18. Mobile Applications/

19. 10 or 11 or 12 or 13 or 14 or 15 or 16 or 17 or 18

20. 9 and 19

21. limit 20 to (english language and humans and yr="2005 -Current")

**2. Characteristics of the nine studies included in the review**

| **Disease management studies** | | |
| --- | --- | --- |
| **Ben-Zeev (2013) – Chicago, United States(**[**22**](#_ENREF_22)**)** | | |
| **Aim** | To describe the development of a smartphone illness self-management system for people with schizophrenia. | |
| **Study design*** | Other design of interest | |
| **Mobile device** | Mobile phone / **Smart phone** / Internet / Other mobile device | |
| **Participants – design** | All participants from one large psychiatric rehabilitation agency in Chicago.  Stage One surveys (n=904 individuals with schizophrenia or schizoaffective disorder + eight practitioners). Mean age individuals = 47yrs; 68% male, 61% Caucasian, 5% Hispanic, 34% less than high school diploma, 74% <$US10,000 annual income.  Stage Two design principles (multidisciplinary team of consumers and practitioners with expertise in illness management, behavioural intervention technologies, telemedicine, smartphone software programming, and public health).  Stage Three laboratory sessions (n=12 consumers with mean age 45yrs, 75% African American, 75% owned and used mobile device) | |
| **Participants – effectiveness** | Effectiveness not evaluated. | |
| **Co-design process** | | |
| **Theory-based framework**** | N | Framework not reported specifically for the co-design component. Intervention developed using the cognitive model of psychosis and the stress-vulnerability model of schizophrenia([41](#_ENREF_41), [42](#_ENREF_42)). |
| **Timeframe for design** | Not reported. | |
| **Methods for engagement** | For stage one service staff surveyed individuals receiving care at the time. Recruitment not reported. | |
| **Co-design process/methods** | **Process:** Three stages. Stage 1 needs assessment – survey of people receiving care at the time asking about ownership and use of technology, payment methods and interest in future services. Info combined with electronic health records. Practitioner input collected via survey of potential use of mobile devices for care provision and group discussion facilitated by authors on how mHealth could best be used in this group. Stage 2 design principles – multidisciplinary team worked together to develop (no further detail provided). Stage 3 usability testing – two hour individual lab based testing – participants asked to perform series of tasks on using a smartphone first in presence of facilitators – one to administer and one to scribe. Feedback provided on the interface look and used all modules with comments and observations documented. Finally, brief questionnaire was completed to rank components of the app and give a list of names for the system to rate. Early testing was on web version of app (n=7) with later testing on native app (n=5).  **Materials:** Web version of app followed by native version. Other materials not reported.  **Number of sessions:** Not reported  **Frequency of sessions:** Not reported  **Spacing of sessions:** Not reported  **Facilitators:** Authors of paper  **Analysis:** Not reported | |
| **Intervention assessed** | N | Disease management - process evaluation only |
| **Evaluation results** | Y | **Design phase:** Stage one survey: Indicated interest in receiving mHealth services delivered via mobile device (44%) including medication and appointment reminders, check ins with practitioners (38%) and education and information about treatment and services (31%). Practitioners saw value in mHealth platform would be useful for monitoring of symptoms and could be remotely accessed by practitioners, would support and expand services and give individuals tools at any time. Recommended going beyond text messages and emphasized importance of suitability for low literacy. Stage Two not evaluated. Stage Three: First round found app was usable, participants had trouble understanding abbreviations and longer words, text too long, font too small, and buttons too close together. Liked images. Second round positive and all felt could use system.  **Usability testing:** Found some design vulnerabilities which resulted in system being adapted to better address consumer needs and preferences.  **Effectiveness:** Not assessed. |
| **Berg (2013) – Sweden(**[**23**](#_ENREF_23)**)** | | |
| **Aim** | To describe the process of developing person-centered web support for women with type 1 diabetes during the period of pregnancy through early motherhood. | |
| **Study design*** | Other design of interest | |
| **Mobile device** | Mobile phone / **Smart phone** / **Internet** / Other mobile device  Internet focused. Smart phone component mentioned but not explained. | |
| **Participants – design** | Phases One and Two: researchers, mothers with type 1 diabetes, healthcare professional in diabetes and perinatal care, and web designers.  Scientific group: Project managers, advisory and scientific reference groups, technical producers, representatives of the target group.  Project management group: scientific leader (n=1), project leaders (n=2), and student midwife (n=1).  Scientific reference group: Medical experts (n=4), IT expert (n=1)  Stakeholder group: Advisory group (doubled as stakeholder consultation group): mothers with type 1 diabetes (n=7), midwives 9n=4)  Technical production group: Project leader (n=1), web programmer (n=1), and designer (n=1) | |
| **Participants – effectiveness** | Effectiveness not assessed. RCT to be undertaken in the future. | |
| **Co-design process** | | |
| **Theory-based framework**** | Y | Stated used participatory design to capture target groups knowledge, experiences and needs ([30](#_ENREF_30)). Also used a systematic two stage process map for systems development to develop web based support which describes key types of participants who should be part of the development process([34](#_ENREF_34)). The two stages include needs assessment, evidence synthesis, and consensus on evidence followed by storyboard, sandpit testing, usability testing, and field testing. |
| **Timeframe for design** | 15 months from formative phase to final intervention developed. | |
| **Methods for engagement** | Not reported. | |
| **Co-design process/methods** | **Process:** Mapping exercise of existing similar websites and a needs assessment (previous research by authors and internationally) followed by participatory design process including three main phases: (1) exploration of work, (2) discovery process, and (3) prototyping to capture knowledge, experiences and needs. Scientific reference group continually consulted. Advisory group input on dissemination, content, structure, usability. Technical production group owned IP and gave advice on content, structure, and applicability.  Methods for development included a web survey and discussions with professionals and methods of target audience. The design phase included a half day workshop on content using storyboarding resulting in a specification document for website and contractor. Sandpit testing used where a prototype was transformed to a website which was then tested by the Advisory Group (mothers and midwives). Several revisions were undertaken before final website produced. Draft text was also reviewed for format and content. Website developed and amended following feedback from groups above.  **Materials:** Storyboard and prototypes.  **Number of sessions:** Not reported  **Frequency of sessions:** Not reported  **Spacing of sessions:** Not reported  **Facilitators:** Not reported  **Analysis:** Not reported | |
| **Intervention assessed** | N | Disease management - process evaluation only |
| **Evaluation results** | Y | **Design phase:** Needs assessment: sharing common experiences important (rest not reported). Evidence synthesis: Time of increased risk for mother and baby. Most important to maintain material normoglycaemia, but hypoglycemic episodes are frequent. Women are stressed, worries, pressure and feel insecure and unpredictable. Mothers focus on baby means less focus on own wellbeing. Gap in healthcare for target women makes transition to motherhood challenging. Consensus on evidence: three main components for intervention i.e. information, self-care diary, and forum for peer support.  **Effectiveness:** Not assessed. |
| **Dingwall (2015) – Northern Territory, Australia(**[**25**](#_ENREF_25)**)** | | |
| **Aim** | To use a participatory action framework to translate the AIMhi (Australian Integrated mental Health Initiative) MCP (motivational care planning) intervention into electronic format and then conduct an initial exploration of the acceptability, feasibility, and appropriateness of this new resource for service providers working with Aboriginal and Torres Strait Islander people in Northern Territory. | |
| **Study design*** | Other design of interest | |
| **Mobile device** | Mobile phone / **Smart phone** / Internet / Other mobile device  SMS intervention tested on smart phones with additional content provided. | |
| **Participants – design** | Expert reference group and service providers involved (n=15) but make up not provided. Service providers (n=15) including health professionals, managers, programme coordinators, and Aboriginal elder involved in delivering mental health, alcohol and other drugs, or chronic disease services to Aboriginal or Torres Strait Islanders. Service providers included Aboriginal and Torres Straight Islanders (n=4) and non-Indigenous (n=11). | |
| **Participants – effectiveness** | Disease management – effectiveness not assessed. | |
| **Co-design process** | | |
| **Theory-based framework**** | M | Stated used participatory action framework but not referenced. Original resource based on problem solving therapy and motivational interviewing. |
| **Timeframe for design** | Full time frame not reported (initial formative phase 1 month) | |
| **Methods for engagement** | Engagement of expert reference group not provided.  Recruitment of service providers through purpose sampling using existing professional networks. | |
| **Co-design process/methods** | **Process:** Five steps: establish team with Queensland University of Technology, review of EIMhi educational and brief intervention resources with research and development team, establish Expert Reference Group, consult with research team and expert group to revise and review app using story board and screen mock ups, and release first version for further testing and evaluation.  11 semi-structured interviews (individual or small groups; ~40mins duration) with 15 service providers and managers. Service providers in other territories also consulted but not included in current study.  **Materials:** Story board and screen mock ups for expert group development. Interview guide for testing of first version.  **Number of sessions:** Expert group development sessions not reported, but n=15 interviews for primary testing.  **Frequency of sessions:** Not reported  **Spacing of sessions:** One per service provider (with one exception) conducted between Oct and Dec 2013.  **Facilitators:** Authors facilitated interviews.  **Analysis:** Interviews were analysed by all members of the research team using thematic analysis. Consensus reached by team on all points and themes were presented to the expert group for further discussion and cross checking. | |
| **Intervention assessed** | Y | 15 service providers and managers trialed for one month. |
| **Evaluation results** | Y | **Design phase:** support provided for acceptability, feasibility, and appropriateness of the app. Key themes: acceptability (visually appealing, easy to use cultural relevance and innovative format), building relationships (breaks down barriers, opens up conversation), broad applicability (to people and settings and ways of using app suggested), constraints to implementation (IT accessibility, time to use longer than paper, resistance by other staff, different Indigenous languages useful), integration with other systems important, and training recommendations (content and process).  **Effectiveness:** Not assessed. |
| **Groussard (2015) – Quebec, Canada(**[**26**](#_ENREF_26)**)** | | |
| **Aim** | To design a mobile cognitive assistant to enhance autonomy of people living with acquired traumatic brain injury, based on their expressed needs, and to conduct a proof of concept to show that the assistant meets the needs. | |
| **Study design*** | Other design of interest | |
| **Mobile device** | Mobile phone / **Smart phone** / Internet / Other mobile device  Mobile assistant was a smart phone app. | |
| **Participants – design** | Male adults with cognitive brain injuries (n=4) and caregivers (n=3). Adults with head injury were unable to live independently and required help with at least one daily living activity, suffered injury for 5yrs+, able to speak, able to live in a residence where they could go to work or volunteer, and able to use electronic device. Caregivers must have looked after person for six months or more. Age range: 30-70yrs.  Other stakeholders: psychoeducators (n=2), and social worker (n=1). | |
| **Participants – effectiveness** | Disease management – effectiveness not assessed. | |
| **Co-design process** | | |
| **Theory-based framework**** | Y | Stated participatory (iterative) design methodologies guided the research([32](#_ENREF_32)). Followed six stages of participatory design outlined by Dolbec (1) perception of the issue, (2) identification of the issue, (3) exploration and planning of the solutions, (4) implementation of the solution, (5) evaluation of the solution, and (6) dissemination([31](#_ENREF_31)). |
| **Timeframe for design** | Timeframe for formative phase not reported.  Three-weeks to train participants to use the app, and eight-week test/pilot. | |
| **Methods for engagement** | Not reported. | |
| **Co-design process/methods** | **Process:** Six steps of participatory design. (1) Perception of issue: consulted University laboratory working with people with head injury on who to include in research; (2) Needs identification: semi-structured interviews with participants and caregivers on life satisfaction, social participation, and computer abilities. Given 20 q’s about life situations and rated feelings on graduation scale. Also completed standard questionnaire evaluating social participation, and q’s about computer use and expectations of the project; (3&4) Exploration, planning, and implementation of solutions: three focus groups to discuss mobile services identified during interviews and determine functionality needed – services presented, discussed, and voted on; (5) Solution evaluation: participants tested the assistive design at home and work, first for six individual meetings of 30 to 60mins. Actions were presented and repeated by participants with time to ask q’s. Ability to complete actions rated by interviewer. Next the service was used as intended in scenarios, and finally in real life situations. An 80% success rate needed to move to next stage. The real life phase lasted eight weeks and included fortnightly meetings to collect use and satisfaction information. Appreciation for life questionnaire administered before pilot test, during, and after.  **Materials:** Questionnaires, methods for showing participants functions and formats for the app.  **Number of sessions:** Interviews (n=4), three focus groups (45mins with 15min break), individual meetings during testing (n=6 per participant 30 to 60mins)  **Frequency of sessions:** Not reported  **Spacing of sessions:** Not reported  **Facilitators:** Not reported  **Analysis:** Appreciation for life scores assessed. Interview questions groups according to social participation issues. Focus group votes assessed. Early phase learning data graphed. Usage logs of smartphones assessed. | |
| **Intervention assessed** | Y | Tested at home and at work for eight weeks. |
| **Evaluation results** | Y | **Design phase:** Three functions proposed for focus groups: time management, money management, and life experience monitoring. During focus groups functions and interfaces for the app were presented, rated, and discussed. Smartphone app then developed.  **Pilot test:** Participants used the app more in the first week, then stabilised. Few live events were recorded, and budgeting tool not used as often as anticipated. Use differed significantly between participants. All participants liked the app but only one would have liked to continue using it. Mixed results for life satisfaction scores.  **Effectiveness:** Not assessed. |
| **Hanson (2007) – West Sweden(**[**24**](#_ENREF_24)**)** | | |
| **Aim** | For researchers, practitioners and technicians in West Sweden to work together with older people with early stage dementia and their family members to develop a user-friendly technology-based information, education and support service, based on the generic ACTION participatory design model. | |
| **Study design*** | Other design of interest | |
| **Mobile device** | Mobile phone / Smart phone / **Internet** / Other mobile device  Programme included personal computer, videophone, and Internet. | |
| **Participants – design** | Phases One and Two: older people with dementia (n=7; 3 women; aged 68-81yrs) and project nurse facilitators (n=2). Inclusion criteria: creative, expressive, willing to contribute and use a computer, 65yrs+, confirmed dementia, Mini-mental state examination (MMSE) score 20+.  Phase Three: n= 19 people with dementia and 12 relatives. Inclusion: awareness, family support, 60yrs+, confirmed dementia, MMSE score 25+. | |
| **Participants – effectiveness** | Disease management – effectiveness not assessed. | |
| **Co-design process** | | |
| **Theory-based framework**** | Y | Stated used Assisting Carers using Telematics Interventions to meet Older People’s Needs (ACTION) participatory design model([33](#_ENREF_33)). The process facilitates collaboration between skilled users and designers, is iterative, comprising cycles of development and evaluation until an agreed solution is reached. It comprises three phases: identifying user needs, early programme development, testing and refining. |
| **Timeframe for design** | ~15 months from formative phase to development of final intervention. | |
| **Methods for engagement** | Phase 1 development group recruited from primary healthcare centres. | |
| **Co-design process/methods** | **Process:** Three phases. One and Two (identifying needs and development). Development group met weekly for 4 months, then fortnightly for 5 months. Users’ needs and preferences explored via discussion groups (tape recorded). Later sessions involved participants photographing and videoing homes to provide useful development material. Changes were made to the programme each session and reviewed at the subsequent session. Tuition on using the computer programme was also provided. The initial programme was quality checked by a geriatrician, modified, and developed into the final 12 week educational support programme. Phase Three (verification) involved programme testing during group sessions (12 weeks) facilitated by two nurses and a multi-media technician. The programme was also installed in participant’s homes. Follow up support was available via videophone with nurses and other participants. In-depth interviews with participants and their next of kin were undertaken prior to the star, during the programme and discussion sessions. A focus group and home interviews were held at the end.  Lessons learned: prioritise overall wellbeing of participants, allow ample time, provide active and continuous support, select a satisfactory location for meetings ensuring good access, toilets, cafeteria, transport etc.  **Materials:** Multimedia screen, videos and photographs from participants.  **Number of sessions:** 26 for development phase and 12 for validation phase.  **Frequency of sessions:** Phases One and Two: weekly for first 4 months then fortnightly. Phase Three: weekly  **Spacing of sessions:** As above  **Facilitators:** Nurses and technicians.  **Analysis:** Discussion sessions were often recorded and notes were taken to inform further stages. No formal analysis methods reported. | |
| **Intervention assessed** | Y | 12 week programme tested by people with dementia and 12 relatives. |
| **Evaluation results** | Y | **Design phase:** Elders with early stage dementia can be actively involved throughout the entire research and development process. Essential prerequisites are time and ongoing support by skilled practitioners and family members. They can also learn and benefit from user-friendly technology, especially when used together with others in a similar situation. Being involved in the design was enjoyable, improved self-confidence and according to spouses resulted in less irritability and more relaxation. Participants were anxious about using the computer but all except two people enjoyed it and felt it boosted self-esteem (although using mouse could be frustrating).  The programme affirmed participant’s recent lives, stimulating them to share experiences and maintain a sense of normality. Provided useful information about services people were not previously aware of. Was relaxing, enabled them to bond with younger family members. There was some difficulty logging in.  **Effectiveness:** Not assessed. |
| **Hingle (2013) – Airzona, United States(**[**20**](#_ENREF_20)**)** | | |
| **Aim** | To develop and test messages and a mobile phone delivery protocol designed to influence the nutrition and physical activity knowledge, attitudes, and behaviour of adolescents. | |
| **Study design*** | Other design of interest | |
| **Mobile device** | **Mobile phone** / **Smart phone** / Internet / Other mobile device  SMS intervention tested on smart phones with additional content provided. | |
| **Participants – design** | One hundred 12 to 18 year olds enrolled in youth programmes between fall 2009 and 2010 (53% female over design and intervention phases).  Focus groups (n=59) and class discussions (n=86) | |
| **Participants – effectiveness** | 12 to 18 year olds enrolled in four youth groups between fall 2009 and 2010 (53% female over design and intervention phases)  Pilot study (not true effectiveness; n=32) | |
| **Co-design process** | | |
| **Theory-based framework**** | M | State uses a multistage youth participatory approach (involving youth in intervention, testing, and evaluation) but no reference given. |
| **Timeframe for design** | 12 months from formative phase to end of pilot study. | |
| **Methods for engagement** | Recruitment through youth educators and leaders from 11 youth programmes that did not specifically focus on health. Letters sent home to parents. | |
| **Co-design process/methods** | **Process:** Focus groups followed by classroom sessions followed by pilot study. Content for SMS created using literature search, popular consumer resources, and survey of 100 freshman college students. 300 messages developed by research team and tested in focus groups. Messages taken to classroom discussions for refinement. In class students given 25 questions to rate as like, needs adjustment, or don’t like based on a class vote. Reasons recorded as to why they weren’t liked. Messages categorised as liked or needs adjustment included in pilot study (once amended where necessary). Findings used for SMS intervention.  **Materials:** Semi structured script for focus groups. Additional information provided on phone in pilot study e.g. recipes, but no information on how this was developed.  **Number of sessions:** Nine focus groups, 4 classroom sessions, 8 week pilot study  **Frequency of sessions:** Not reported  **Spacing of sessions:** Not reported  **Facilitators:** Discussions led by experts in qualitative research with teens.  **Analysis:** Written field notes and audio recordings transcribed. Deductive thematic analysis to produce themes from field notes. Two interviewers checked to ensure validity and a summary report was written to inform message delivery protocol. | |
| **Intervention assessed** | Y | 8 week pilot study. Participants provided with smart phone to ensure all had same technology and messages didn’t cost. Two software programmes tested – weeks one to four ‘pop up’ messages at predetermined times and weeks five to eight one message per day + teaser message once per week to interact with additional content loaded to phone e.g. recipes. Informal small group interviews at end of pilot study to gather feedback. |
| **Evaluation results** | Y | **Design phase:** Short messages and quizzes preferred over longer messages (polls, scenarios, and recipes). Messages should be short, direct, and relevant. Voice important i.e. not authoritarian. Additional topic suggestions made and only 2 messages per day maximum from a credible source.  **Pilot study:** Participants enjoyed messages but some were better than others. Shared with friends and family. Liked feedback loop on SMS. Preferred two messages per day at predetermined times as these were the ones they could interact with.  **Effectiveness:** Not assessed. |
| **Kanis (2009) – Scotland(**[**27**](#_ENREF_27)**)** | | |
| **Aim** | To increase understanding of the design of technologies that support the elicitation and sharing of positive emotions. Further, to develop a tool to encourage social expressiveness that allows investigation and to improve the potential for shared positive communication. | |
| **Study design*** | Other design of interest | |
| **Mobile device** | Mobile phone / **Smart phone** / Internet / Other mobile device  Smart phone app | |
| **Participants – design** | Study one: children and young people from local Scottish schools, 6 to 15 yrs, in three classrooms on the Highlands and Islands during an educational event. Approx 50% female.  Study two: International (United States, Canada, Romania, Germany, Israel, United Kingdom).  Participants on Flckr (photo sharing) and 43 things (where users create goals and desires) social networking sites. ~50 participants over the two studies. | |
| **Participants – effectiveness** | Effectiveness not assessed | |
| **Co-design process** | | |
| **Theory-based framework**** | N | Stated as two co-design studies, but no theory mentioned or referenced. |
| **Timeframe for design** | Six months for formative phase but timeframe for app development not reported. | |
| **Methods for engagement** | Recruitment for studies not reported. | |
| **Co-design process/methods** | **Process:** Two studies to inform the design steps and rationale for the app. Study one aimed to test different prefixes for expressing positive effects. Study two aimed to determine how positive expressions can be triggered, shared, and mediated by desktop and internet technology. Studies followed by a review of positive emotions posted on online sites Flickr (photo sharing) and 43things (where users create goals and desires) to gain wider understanding of positive emotions shared on a daily basis. Findings used to develop a smart phone app (PosiPost) which lets users create posts by asking them to finish a sentence starting with a prefix. Users receive one post back for each one they send. A website provides support and displays posts.  **Materials:** Study one used a paper slips where participants finished an incomplete sentence with a range of prefixes to capture positive thoughts and posted it in a box. Study two used the same method but rather than paper based did this via online social tools i.e. a blog, emails, and anonymous chat room scenario.  **Number of sessions:** Not reported  **Frequency of sessions:** Not reported  **Spacing of sessions:** Not reported  **Facilitators:** Not reported  **Analysis:** Postings from both studies were coded into 10 categories by type, by two people to ensure reliability. Postings could have multiple categories. | |
| **Intervention assessed** | N |  |
| **Evaluation results** | Y | **Design phase:** Some prefixes more popular than others e.g. expressing emotions right here right now. Subjective wellbeing includes overcoming negative emotions and experiences, wealth and material possession, flow, progress, and accomplishment, social contact, savouring ordinary activities in daily life. Design consideration results for the app: design for positive reflection, for function, in a positive voice, in an effective format, using a range of prefixes, being cautious not to disclose private information, and to allow people to express emotions immediately.  **Pilot study:** No evaluation undertaken.  **Effectiveness:** Not assessed. |
| **Lin (2015) – United States(**[**21**](#_ENREF_21)**)** | | |
| **Aim** | To describe the design and development of the intervention tested in the Cell Phone Intervention for You study and to highlight the importance of adaptive intervention design that made it possible. | |
| **Study design*** | RCT - 24 month RCT comparing two active interventions to usual care control group. Main outcome: weight change at 24 months. Outcome measurement: Blue tooth body weight scales provided. | |
| **Mobile device** | Mobile phone / **Smart phone** / Internet / Other mobile device  Smart phone app (10 components that covered personal coaching) vs. personal coaching (six weekly sessions lasting ~2hr each with 5 to 10 per group and monthly coaching phone call + app to monitor weight, diet and physical activity, but no feedback loop). The main feature of the app was prompting behaviour. Iterative/adaptive design where intervention updated throughout the trial. | |
| **Participants – design** | Focus groups: n=33 people with same characteristics as target population.  First cohort of RCT (n not reported) also provided feedback on app components – incorporated for following cohorts. | |
| **Participants – effectiveness** | N=365 overweight or obese (BMI≥25kg/m2) young adults (18 to 35yrs). | |
| **Co-design process** | | |
| **Theory-based framework**** | Y | Stated used iterative, participatory design where potential users are engaged in the process of design creation([29](#_ENREF_29)).  Active interventions were based on a behavioural framework including social cognitive theory and techniques from behavioural self-management and motivation enhancement. |
| **Timeframe for design** | 12 months formative phase (no pilot testing). | |
| **Methods for engagement** | Not reported. | |
| **Co-design process/methods** | **Process:** Focus groups (n=6) to inform advertising strategies, message framing, preferred format, and intervention content; single-person participatory design sessions for usability evaluation and improvement; technical testing; and phased roll out of the intervention content. A phased roll out was used to deliver app components to ensure they worked and were engaging, with participants giving feedback along the way via reports generated on app use, and calls with participants every 6 months where three q’s asked: what do you like/dislike, what changes would you like to help with weight loss, and how is the prompting working or not for you? New components were also designed during first cohort of trial.  **Materials:** Paper prototypes of app components were developed, tested, and refined with input before software developed. Testing of prototypes undertaken.  **Number of sessions:** Not reported  **Frequency of sessions:** Not reported  **Spacing of sessions:** Not reported  **Facilitators:** Not reported  **Analysis:** Not reported | |
| **Intervention assessed** | N | 24 month iterative/adaptive RCT comparing two active interventions (cell phone intervention and personal coaching with a mobile app to allow self-monitoring but no feedback) to usual care control group. Results to come in future paper. |
| **Evaluation results** | N | **Design phase:** Not reported.  **Effectiveness RCT:** Results to come in future paper. |
| **Pulman (2013) – South West United Kingdom(**[**28**](#_ENREF_28)**)** | | |
| **Aim** | To develop an insight into young people’s current use of web and mobile technology and its potential impact on HRoL by constructing an in-depth picture of their day-to-day experiences, exploring how they made use of technology in their lives and in relation to their condition and treatment – then building something to help them. | |
| **Study design*** | Other design of interest | |
| **Mobile device** | Mobile phone / **Smart phone** / Internet / Other mobile device  Smartphone app | |
| **Participants – design** | Young people (n=9; 7 female; 18 to 21yrs) with type 1 diabetes. Inclusion: type 1 diabetes, six months post diagnosis, within age at date of recruitment, fluent in English.  A dietitian reviewed content intended for the app.  Clinic staff at Diabetes Centre tested the first prototype.  The Patient Advice and Liaison Service reviewed the final versions of the app. | |
| **Participants – effectiveness** | Disease management – effectiveness not assessed. | |
| **Co-design process** | | |
| **Theory-based framework**** | Y | Stated uses sociotechnical design principles during the design and build of the app([35](#_ENREF_35)). Involves defining human needs using the people associated with, and affected by, the technology. This includes democratic and participative communication and decision making to give people a voice. |
| **Timeframe for design** | Not reported | |
| **Methods for engagement** | Recruitment of participants from local diabetes centre within a hospital – used a non-random, convenience sample which was purposive. | |
| **Co-design process/methods** | **Process:** Semi-structured, in-depth qualitative interviews (1hr duration) covering experiences of mobile and computer technology, diagnosis and how technology used since, aspects of day to day life with diabetes, any technology used related to their condition, and any health related or social apps used. Ideas were explored for how to improve aspects and whether technology would help. Early interviews (n=4) to locate potential ideas for technological development, and latter interviews (n=5) to assist in iterative design process.  Ideas from early interviews used to develop three prototypes shown to participants in latter interviews. Participants were observed using the apps to see what needed to be changed re navigation, and what was of interest. They also chose their favourite.  The final app on alcohol was developed from course content after examination by a dietitian and was also tested by clinicians (who completed questionnaire). Further feedback sought from Patient Advice and Liaison Service, and following submission to the Apple store.  Five iterations of app in total based on all feedback.  **Materials:** Prototypes of the apps  **Number of sessions:** Nine interviews in total  **Frequency of sessions:** Not reported  **Spacing of sessions:** Not reported  **Facilitators:** Not reported  **Analysis:** Interviews were transcribed and loaded onto NVivio for theme identification. | |
| **Intervention assessed** | N | Process evaluation only as per above. |
| **Evaluation results** | Y | **Design phase:** Three ideas from early interviews taken forward for prototyping (alcohol, illness, and hypoglycaemia) with one (alcohol education guide) taken into final app development.  **Effectiveness:** Not assessed. |

**3. Sufficiency of reporting for the nine studies included in the review***

| **Author (year)** | **Setting** | **Stakeholders** | **Facilitators** | **Co-design methods** | **Materials adequately described** | **Length of design and sessions clear** | **Interval and frequency of sessions clear** | **Score (from previous seven attributes)** |
| --- | --- | --- | --- | --- | --- | --- | --- | --- |
| Ben-Zeev (2013) – Chicago, United States([22](#_ENREF_22)) | Clear | Unclear | Clear | Unclear | Yes | No | No | 3 |
| Berg (2013) – Sweden([23](#_ENREF_23)) | Clear | Unclear | Unclear | Unclear | No | No | No | 1 |
| Dingwall (2015) – Northern Territory, Australia([25](#_ENREF_25)) | Clear | Unclear | Clear | Unclear | No | No | No | 2 |
| Groussard (2015) – Quebec, Canada([26](#_ENREF_26)) | Clear | Unclear | Unclear | Clear | No | Yes | No | 3 |
| Hanson (2007) – West Sweden([24](#_ENREF_24)) | Clear | Unclear | Clear | Clear | No | Yes | Yes | 5 |
| Hingle (2013) – Airzona, United States([20](#_ENREF_20)) | Clear | Unclear | Clear | Clear | No | No | No | 3 |
| Kanis (2009) – Scotland([27](#_ENREF_27)) | Clear | Unclear | Unclear | Unclear | Yes | Yes | No | 3 |
| Lin (2015) – United States([21](#_ENREF_21)) | Clear | Unclear | Unclear | Clear | No | No | No | 2 |
| Pulman (2013) – South West United Kingdom([28](#_ENREF_28)) | Clear | Unclear | Unclear | Clear | No | Yes | No | 3 |

*Sufficiency of reporting was undertaken using an amended version of an eight item checklist for reporting non-pharmacological interventions([18](#_ENREF_18), [19](#_ENREF_19))
